# Supplementary material for: Synthesis and Characterization of Hollow-Sphered Poly(N-methyaniline) for Enhanced Electrical Conductivity Based on the Anionic Surfactant Templates and Doping
Source: MDPI journal article supplement (doi:10.3390/polym12051023), 2020-05-01
Supplement: s1 [file s1]

# Synthesis and Characterization of Hollow-Sphered Poly(N-methylaniline) for Enhanced Electrical Conductivity Based on the Anionic Surfactant Templates and Doping

**Table S1.** Chemical structures of surfactants

| Surfactant structure                                                                                                        | Abbreviation |
|-----------------------------------------------------------------------------------------------------------------------------|--------------|
| <b>Sodium dodecylsulfate</b><br>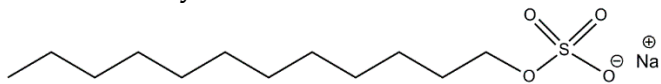           | SDS          |
| <b>Sodium dodecylbenzenesulfonate</b><br>  | SDBS         |
| <b>Dioctyl sodium sulfosuccinate</b><br> | AOT          |

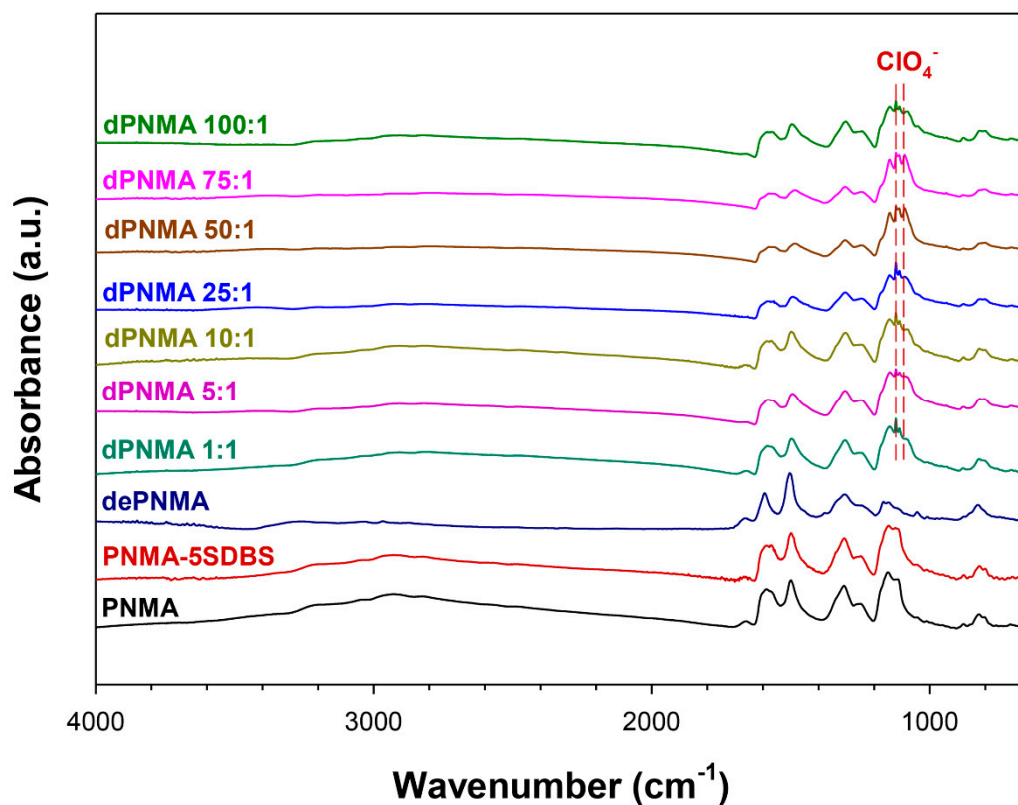

**Figure S1.** FTIR spectra of the PNMA synthesized without surfactant, PNMA before (PNMA-5SDBS) and after (dePNMA) the de-doping step, and the PNMA re-doped at various the doping mole ratios in the wavenumber range of 4000–650 cm<sup>-1</sup>.

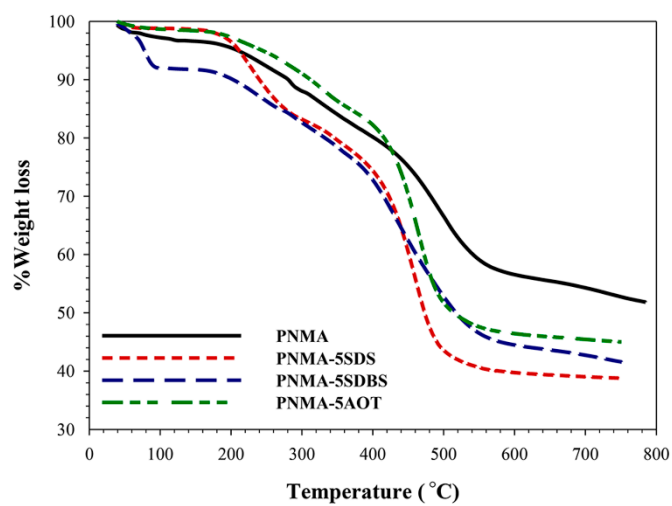

**Figure S2.** TGA thermograms of the PNMA synthesized without surfactant and with different anionic surfactants, namely SDS, SDBS, AOT, at the concentration of 5 CMC.
